# Supplementary material
Source: PubMed Central journal article supplement (PMC549353)
Supplement: molcellb_25_5_1680__1.pdf [file molcellb_25_5_1680__1.pdf]

## Supplementary Figure 1

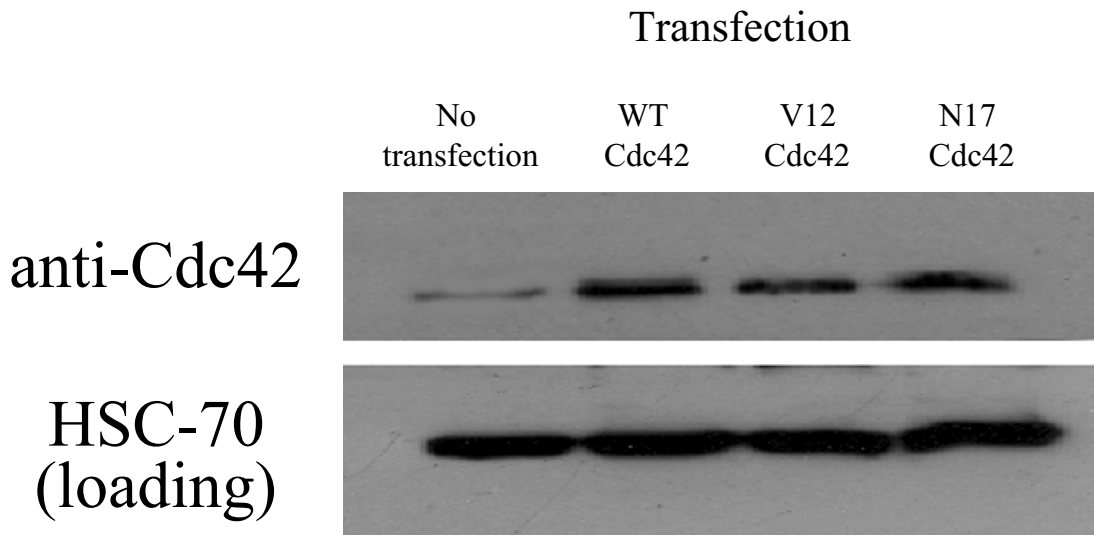

### Relative levels of transfected Cdc42 variants

MDA-MB-231 cells transfected with WT, V12 or N17 variants or Cdc42 were lysed and subjected to western blot analysis for Cdc42 or HSC-70 as a loading control. Data demonstrates a similar level of transfection of all Cdc42 variants.
