# Supplementary material
Source: PubMed Central journal article supplement (PMC549353)
Supplement: molcellb_25_5_1680__2.pdf [file molcellb_25_5_1680__2.pdf]

## Supplementary Figure 2

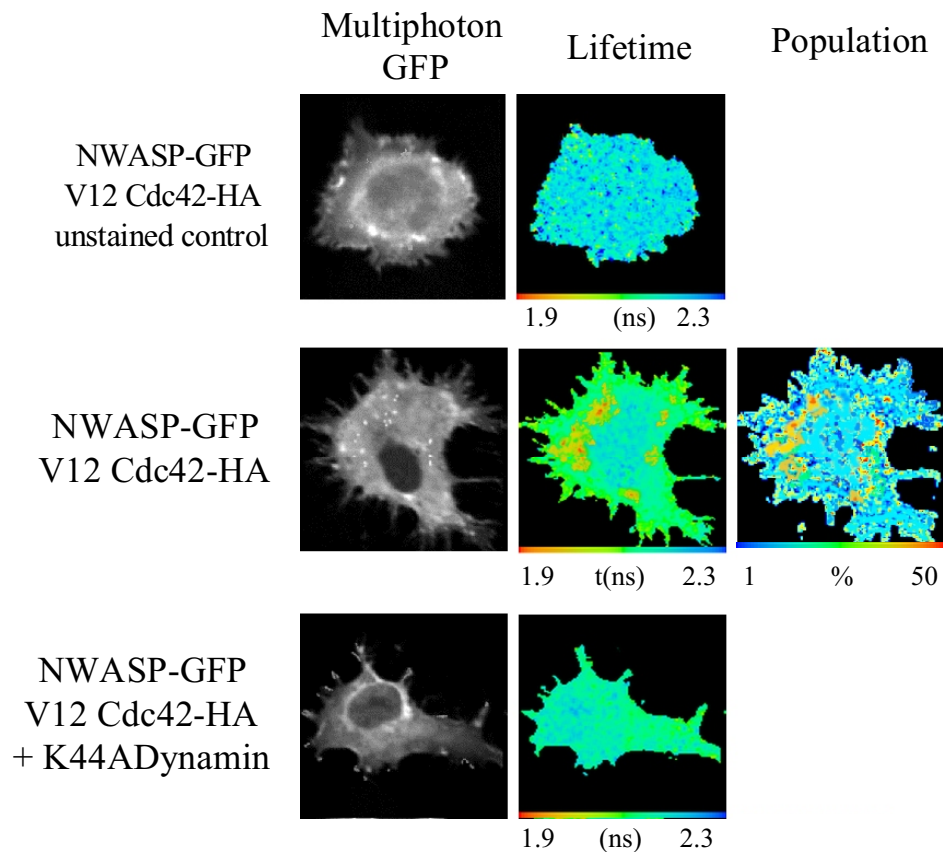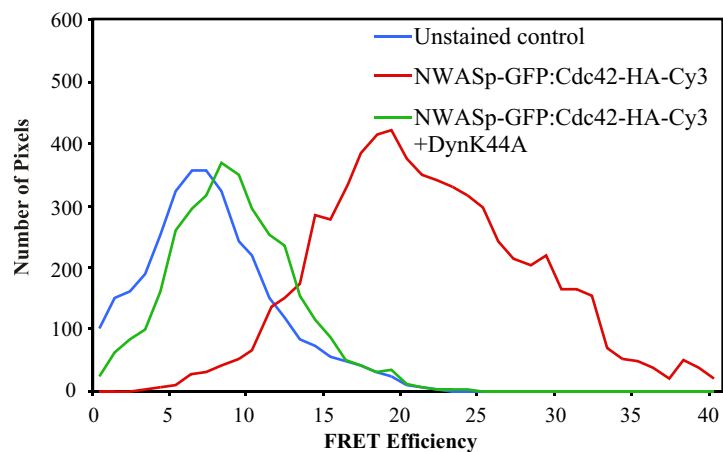

### Dominant-negative dynamin (K44A) inhibits N-WASP:Cdc42 interaction

MDA-MB-231 cells expressing N-WASP-GFP and V12 Cdc42-HA (stained with anti-HA-Cy3) plus or minus expression of dominant negative form of Dynamin (K44A) were subjected to multiphoton FLIM analysis. Efficiency histogram of combined data (bottom panel) indicates a reduction in FRET efficiency in the presence of the mutant Dynamin.
