# Supplementary material
Source: PubMed Central journal article supplement (PMC549353)
Supplement: molcellb_25_5_1680__3.pdf [file molcellb_25_5_1680__3.pdf]

## Supplementary Figure 3

### FILM

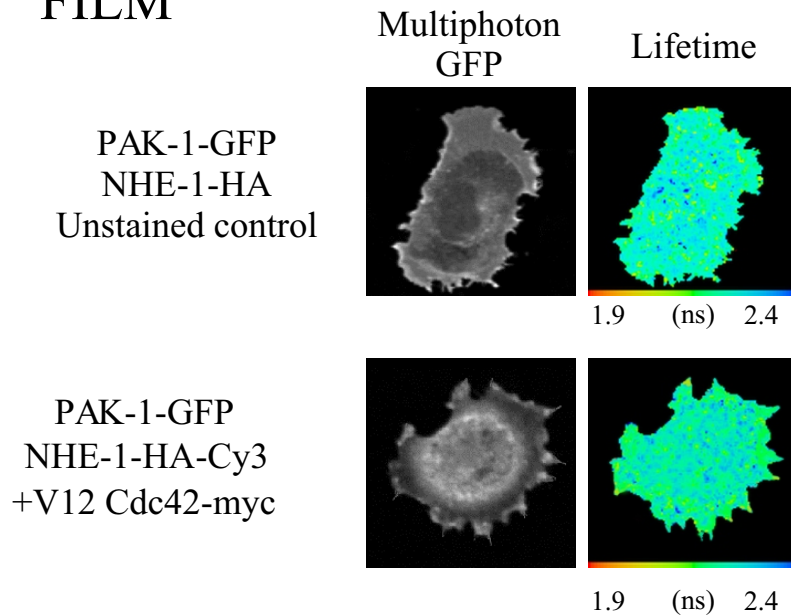

### Confocal

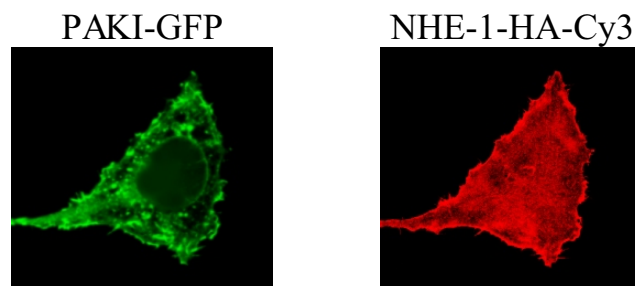

FRET does not occur non-specifically between proteins at peripheral membranes  
MDA-MB-231 cells expressing PAK-1-GFP and NHE-1-HA (stained with an anti-HA-Cy3 antibody) in the presence of V12 Cdc42 were imaged by multiphoton FLIM. GFP lifetime maps are shown for control cells (unstained) and those stained with anti-HA-Cy3. Parallel samples were also imaged in the LSM 510 confocal microscope to demonstrate the presence of NHE-1 in these cells (bottom panels).
